# Supplementary material
Source: PubMed Central journal article supplement (PMC6210121)
Supplement: zam999118846s1.pdf [file zam999118846s1.pdf]

1  
2  
3  
4  
5  
6  
7  
8  
9  
10  
11  
12  
13  
14

## Supplementary Information 1

### Metabolic Interactions of a Chain Elongation Microbiome

Wenhao Han<sup>a,b</sup>, Pinjing He<sup>b,c,d</sup>, Liming Shao<sup>b,c,d</sup>, Fan Lü<sup>a,c,\*</sup>

<sup>a</sup> *State Key Laboratory of Pollution Control and Resource Reuse, Tongji University, Shanghai 200092, China*

<sup>b</sup> *Shanghai Institute of Pollution Control and Ecological Security, Shanghai 200092, P.R. China*

<sup>c</sup> *Institute of Waste Treatment and Reclamation, Tongji University, Shanghai 200092, China*

<sup>d</sup> *Centre for the Technology Research and Training on Household Waste in Small Towns & Rural Area, Ministry of Housing and Urban-Rural Development of PR China (MOHURD), China*

\* *Corresponding author: Fan Lü (lvfan.rhodea@tongji.edu.cn)*

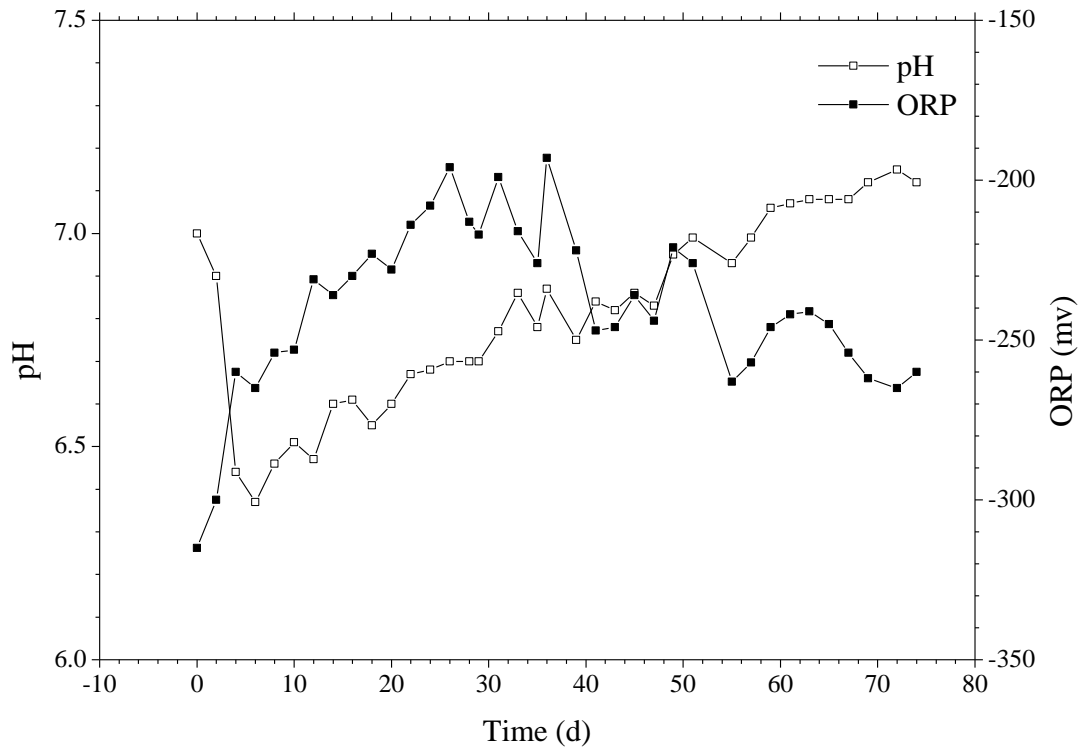

16

17

18

19

**Figure S1. Changes of pH and oxidation-reduction potential (ORP) during the operation period.**

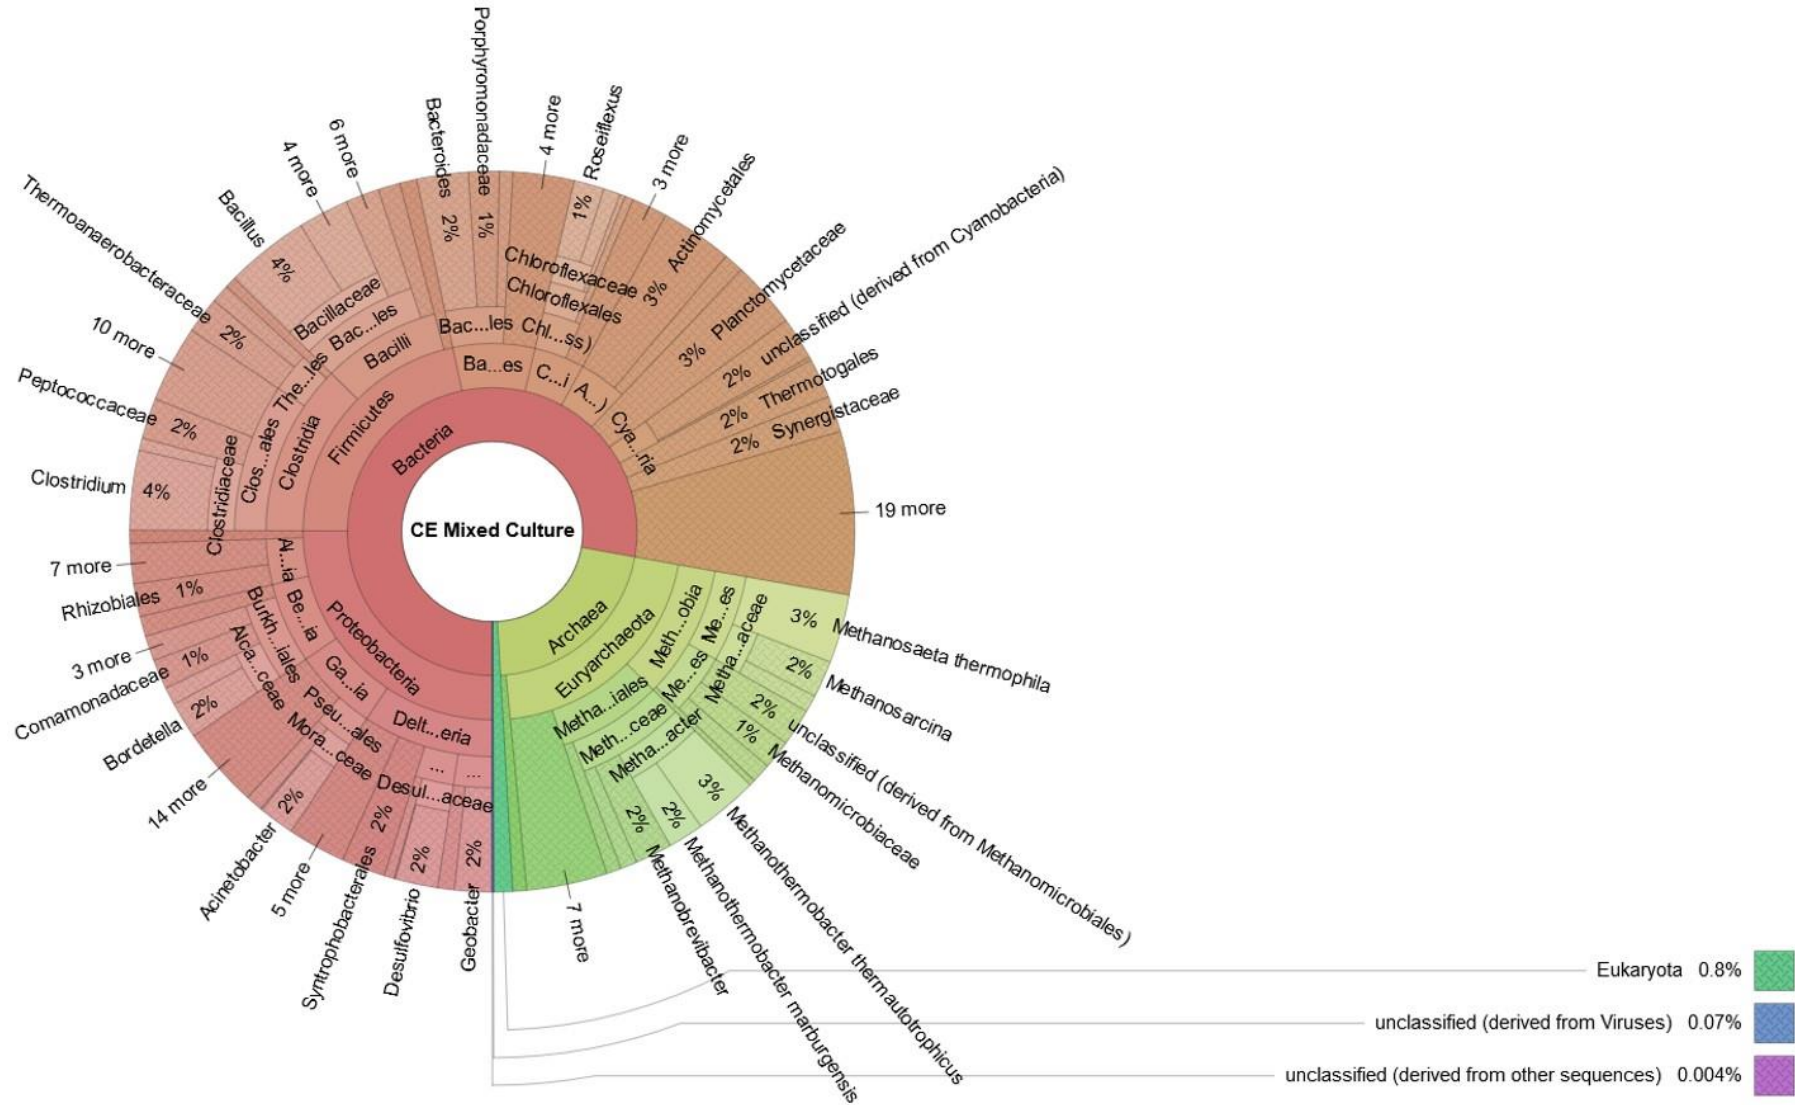

**Figure S2. Whole interactive krona chart of the full taxonomy based on DNA sequences.**

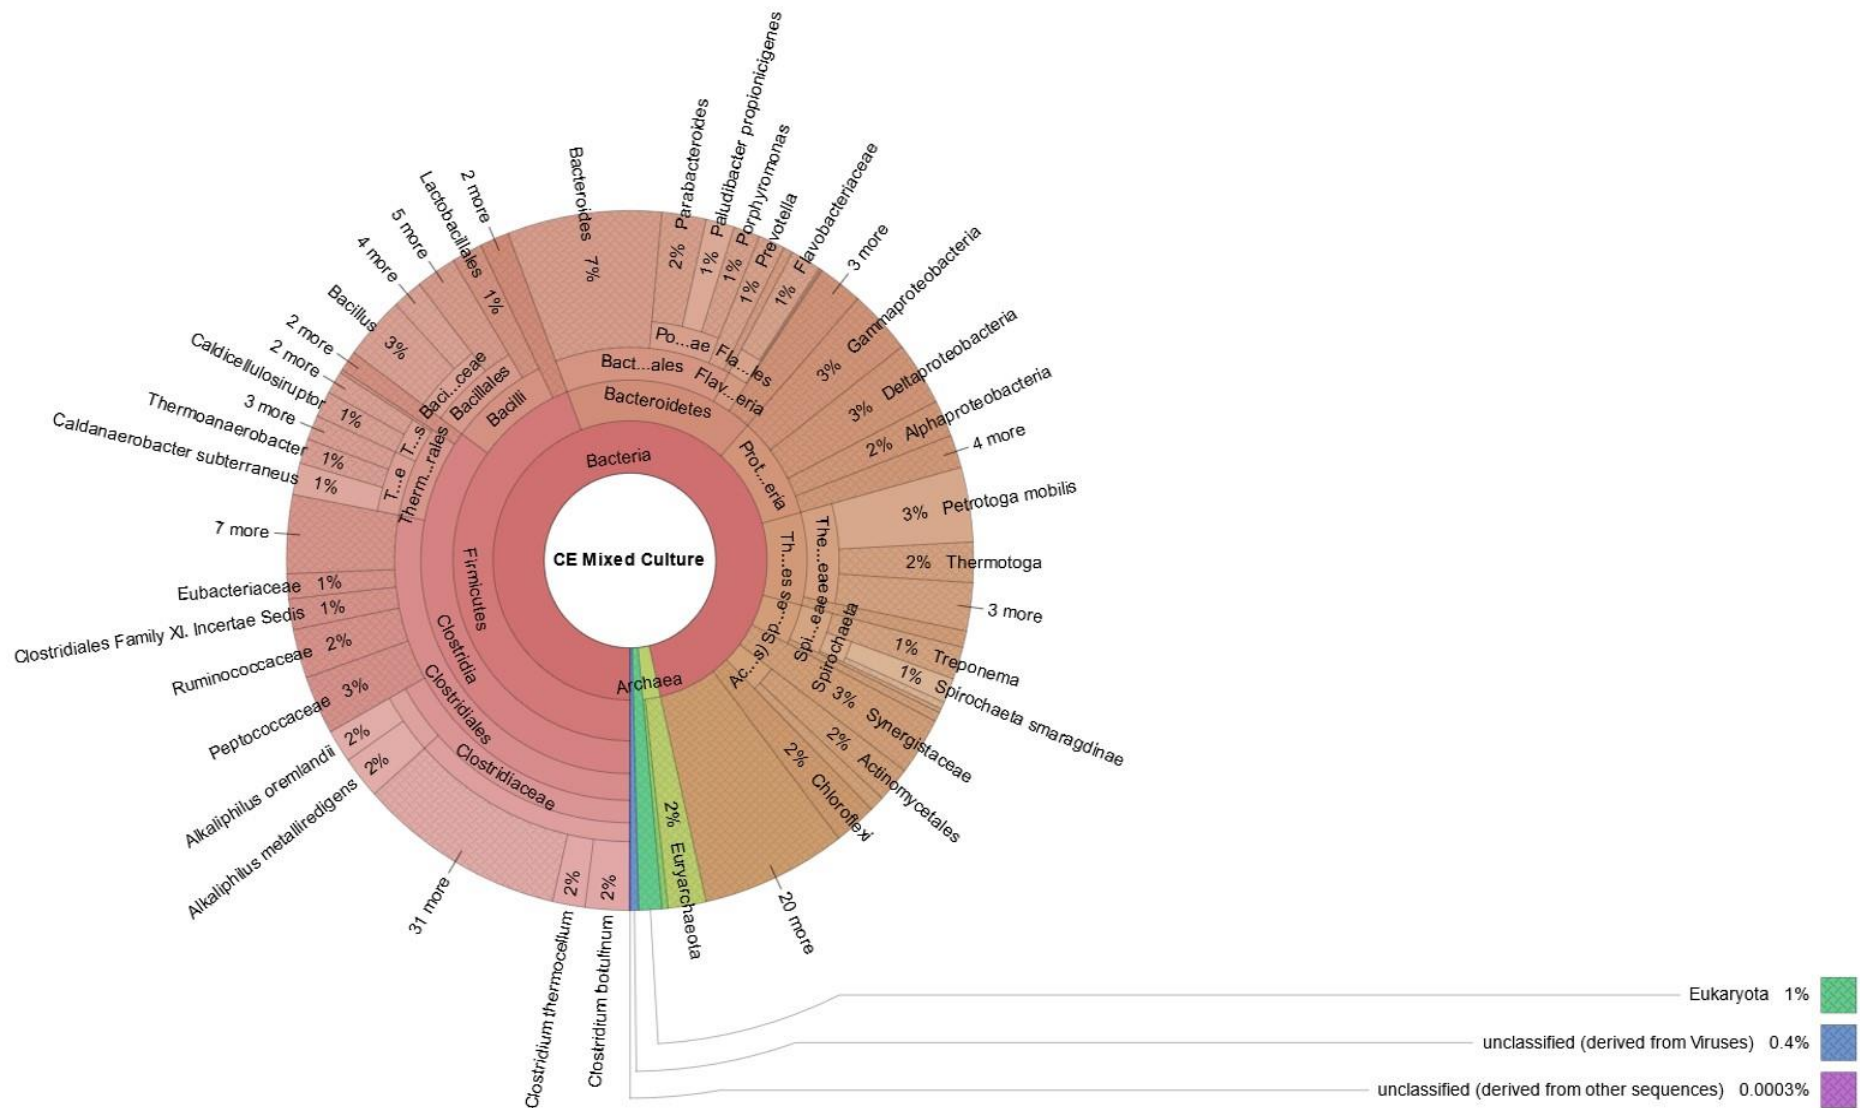

23

24 **Figure S3. Whole interactive krona chart of the full taxonomy based on cDNA sequence.**

25

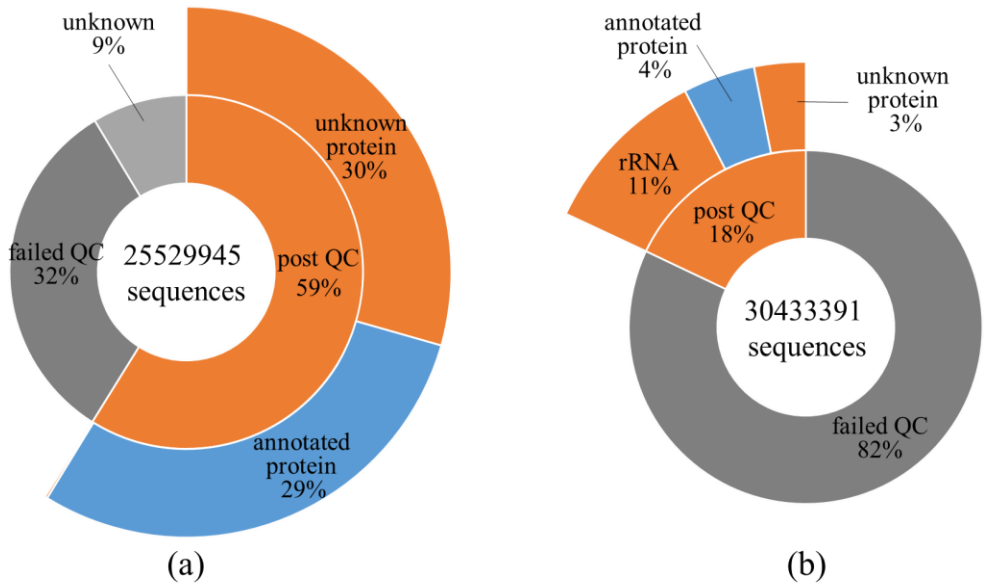

26

27 **Figure S4. DNA and cDNA sequence quality. (a) DNA, (b) cDNA; average: 150**  
28 **bp/sequence.**

29

30 **Table S1. Gas production.**

| Time (day)                                                     | 4     | 8     | 16    | 20    | 24   | Total |
|----------------------------------------------------------------|-------|-------|-------|-------|------|-------|
| Gas volume (L)                                                 | 1.882 | 0.623 | 0.324 | 0.154 | 0    | 2.983 |
| CH <sub>4</sub> concentration (%)                              | 5.68  | 7.39  | 0.90  | 0.64  | 0.00 | /     |
| CO <sub>2</sub> concentration (%)                              | 1.04  | 0.96  | 2.35  | 0.25  | 0.00 | /     |
| H <sub>2</sub> concentration (%)                               | 7.36  | 37.23 | 0.00  | 0.00  | 0.00 | /     |
| CH <sub>4</sub> production (mmol)                              | 4.23  | 1.82  | 0.12  | 0.04  | 0.00 | 6.21  |
| CO <sub>2</sub> production (mmol)                              | 0.77  | 0.23  | 0.30  | 0.02  | 0.00 | 1.33  |
| H <sub>2</sub> production (mmol)                               | 5.48  | 9.18  | 0.00  | 0.00  | 0.00 | 14.66 |
| CH <sub>4</sub> production / substrate* (%,<br>Base on carbon) | 0.15  | 0.06  | 0.00  | 0.00  | 0.00 | 0.22  |
| CO <sub>2</sub> production / substrate* (%,<br>Base on carbon) | 0.03  | 0.01  | 0.01  | 0.00  | 0.00 | 0.05  |

31 \*substrate: 60 mM ethanol + 20 mM acetate

32

33 **Table S2. Annotated gene hits against different databases available at MG-**  
 34 **RAST.**

35

|              | Database   | Metagenome | Metatranscriptome |
|--------------|------------|------------|-------------------|
| Protein      | RefSeq     | 7,688,887  | 1,254,074         |
|              | IMG        | 6,619,183  | 1,089,161         |
|              | TrEMBL     | 6,522,003  | 1,103,386         |
|              | SEED       | 4,560,118  | 676,086           |
|              | KEEG       | 6,466,532  | 937,965           |
|              | GenBank    | 7,020,441  | 1,184,626         |
|              | SwissProt  | /          | 178,761           |
|              | PATRIC     | /          | 975,387           |
| Hierarchical | Subststems | 3,227,567  | 534,629           |
|              | KO         | 2,931,825  | 499,106           |
|              | COG        | 2,885,237  | 404,565           |
|              | NOG        | 28,584     | 6,014             |
| rRNA         | RDP        | 10,182     | 2,542,385         |
|              | Silva LSU  | /          | 2,312,670         |
|              | Silva SSU  | /          | 2,801,991         |
|              | Greengenes | 8,185      | 1,691,280         |

36

37 **Table S3. Taxonomic affiliation at different levels based on DNA sequences**  
 38 **from RefSeq database.**

|        |                                           |       |
|--------|-------------------------------------------|-------|
| Domain | Bacteria                                  | 78.1% |
|        | Archaea                                   | 20.9% |
|        | Eukaryota                                 | 0.9%  |
|        | Viruses                                   | 0.1%  |
| Phylum | Proteobacteria                            | 25.3% |
|        | Firmicutes                                | 21.6% |
|        | Euryarchaeota                             | 20.2% |
|        | Bacteroidetes                             | 6.9%  |
|        | Actinobacteria                            | 4.3%  |
|        | Chloroflexi                               | 4.2%  |
|        | Planctomycetes                            | 2.9%  |
|        | Cyanobacteria                             | 2.2%  |
|        | Thermotogae                               | 1.8%  |
|        | Synergistetes                             | 1.6%  |
|        | Acidobacteria                             | 0.9%  |
|        | Chlorobi                                  | 0.9%  |
|        | Verrucomicrobia                           | 0.9%  |
|        | Spirochaetes                              | 0.9%  |
|        | Deinococcus-Thermus                       | 0.8%  |
|        | Crenarchaeota                             | 0.5%  |
|        | Aquificae                                 | 0.5%  |
|        | unclassified (derived from Bacteria)      | 0.5%  |
|        | Fusobacteria                              | 0.4%  |
|        | Nitrospirae                               | 0.4%  |
| Class  | Clostridia                                | 12.3% |
|        | Methanomicrobia                           | 9.3%  |
|        | Deltaproteobacteria                       | 9.2%  |
|        | Bacilli                                   | 8.5%  |
|        | Methanobacteria                           | 7.2%  |
|        | Gammaproteobacteria                       | 6.2%  |
|        | Betaproteobacteria                        | 5.8%  |
|        | Actinobacteria (class)                    | 4.3%  |
|        | Bacteroidia                               | 4.2%  |
|        | Alphaproteobacteria                       | 3.5%  |
|        | Planctomycetacia                          | 2.9%  |
|        | Chloroflexi (class)                       | 2.7%  |
|        | unclassified (derived from Cyanobacteria) | 2.0%  |
|        | Thermotogae (class)                       | 1.8%  |



|                |                                                |      |
|----------------|------------------------------------------------|------|
|                | Synergistia                                    | 1.6% |
|                | Methanococci                                   | 1.2% |
|                | Flavobacteria                                  | 1.1% |
|                | Chlorobia                                      | 0.9% |
|                | Spirochaetes (class)                           | 0.9% |
|                | Sphingobacteria                                | 0.8% |
|                | <hr/>                                          |      |
| Order          | Clostridiales                                  | 9.3% |
|                | Bacillales                                     | 7.5% |
|                | Methanobacteriales                             | 7.2% |
|                | Methanosarcinales                              | 5.4% |
|                | Burkholderiales                                | 4.9% |
|                | Bacteroidales                                  | 4.2% |
|                | Methanomicrobiales                             | 3.7% |
|                | Actinomycetales                                | 3.4% |
|                | Planctomycetales                               | 2.9% |
|                | Thermoanaerobacterales                         | 2.4% |
|                | Pseudomonadales                                | 2.4% |
|                | Desulfuromonadales                             | 2.4% |
|                | Desulfovibrionales                             | 2.3% |
|                | Chloroflexales                                 | 2.3% |
|                | Syntrophobacterales                            | 1.9% |
|                | Thermotogales                                  | 1.8% |
|                | Synergistales                                  | 1.6% |
|                | Rhizobiales                                    | 1.6% |
|                | Methanococcales                                | 1.2% |
|                | Chroococcales                                  | 1.1% |
|                | <hr/>                                          |      |
| Family         | Methanobacteriaceae                            | 6.6% |
|                | Bacillaceae                                    | 5.9% |
|                | Clostridiaceae                                 | 4.1% |
|                | Methanosaetaceae                               | 3.0% |
|                | Planctomycetaceae                              | 2.9% |
|                | Methanosarcinaceae                             | 2.4% |
|                | Alcaligenaceae                                 | 2.4% |
|                | Bacteroidaceae                                 | 2.3% |
|                | Chloroflexaceae                                | 2.1% |
|                | Desulfovibrionaceae                            | 1.9% |
|                | Peptococcaceae                                 | 1.8% |
|                | Geobacteraceae                                 | 1.6% |
|                | Moraxellaceae                                  | 1.6% |
|                | unclassified (derived from Methanomicrobiales) | 1.6% |
|                | Thermoanaerobacteraceae                        | 1.6% |
| Synergistaceae | 1.6%                                           |      |

|       |                                           |      |
|-------|-------------------------------------------|------|
|       | Porphyrimonadaceae                        | 1.3% |
|       | Comamonadaceae                            | 1.3% |
|       | Thermotogaceae                            | 1.3% |
|       | Methanomicrobiaceae                       | 1.3% |
|       | unclassified (derived from Chroococcales) | 1.1% |
|       | Flavobacteriaceae                         | 1.0% |
|       | Syntrophobacteraceae                      | 1.0% |
|       | Syntrophaceae                             | 0.9% |
|       | Burkholderiaceae                          | 0.9% |
|       | Chlorobiaceae                             | 0.9% |
|       | Enterobacteriaceae                        | 0.8% |
|       | Ruminococcaceae                           | 0.8% |
|       | Pseudomonadaceae                          | 0.8% |
|       | Desulfobacteraceae                        | 0.7% |
|       | <hr/>                                     |      |
|       | <i>Methanothermobacter</i>                | 4.3% |
|       | <i>Bacillus</i>                           | 3.7% |
|       | <i>Clostridium</i>                        | 3.6% |
|       | <i>Methanosaeta</i>                       | 3.0% |
|       | <i>Bacteroides</i>                        | 2.3% |
|       | <i>Desulfovibrio</i>                      | 1.9% |
|       | <i>Geobacter</i>                          | 1.6% |
|       | <i>Methanosarcina</i>                     | 1.6% |
|       | <i>Methanobrevibacter</i>                 | 1.6% |
|       | <i>Bordetella</i>                         | 1.6% |
|       | <i>Acinetobacter</i>                      | 1.6% |
|       | <i>Roseiflexus</i>                        | 1.3% |
|       | <i>Lysinibacillus</i>                     | 1.0% |
| Genus | <i>Syntrophobacter</i>                    | 1.0% |
|       | <i>Syntrophus</i>                         | 0.9% |
|       | <i>Methanoregula</i>                      | 0.9% |
|       | <i>Methanoculleus</i>                     | 0.9% |
|       | <i>Geobacillus</i>                        | 0.8% |
|       | <i>Achromobacter</i>                      | 0.8% |
|       | <i>Chloroflexus</i>                       | 0.7% |
|       | <i>Pirellula</i>                          | 0.7% |
|       | <i>Methanosphaera</i>                     | 0.7% |
|       | <i>Methanosphaerula</i>                   | 0.7% |
|       | <i>Methanocaldococcus</i>                 | 0.7% |
|       | <i>Blastopirellula</i>                    | 0.7% |
|       | <i>Pseudomonas</i>                        | 0.7% |
|       | <i>Planctomyces</i>                       | 0.7% |
|       | <i>Parabacteroides</i>                    | 0.6% |

|                                       |                                                            |      |
|---------------------------------------|------------------------------------------------------------|------|
|                                       | <i>Methanothermus</i>                                      | 0.6% |
|                                       | <i>Methanospirillum</i>                                    | 0.6% |
| Species                               | <i>Methanosaeta thermophila</i>                            | 3.0% |
|                                       | <i>Methanothermobacter thermautotrophicus</i>              | 2.7% |
|                                       | <i>Methanothermobacter marburgensis</i>                    | 1.5% |
|                                       | <i>Methanobrevibacter smithii</i>                          | 1.0% |
|                                       | <i>Syntrophobacter fumaroxidans</i>                        | 1.0% |
|                                       | <i>Syntrophus aciditrophicus</i>                           | 0.9% |
|                                       | <i>Methanoregula boonei</i>                                | 0.9% |
|                                       | <i>Methanoculleus marisnigri</i>                           | 0.9% |
|                                       | <i>Pirellula staleyii</i>                                  | 0.7% |
|                                       | <i>Methanosphaera stadtmanae</i>                           | 0.7% |
|                                       | <i>Lysinibacillus sphaericus</i>                           | 0.7% |
|                                       | <i>Methanosphaerula palustris</i>                          | 0.7% |
|                                       | <i>Roseiflexus</i> sp. RS-1                                | 0.7% |
|                                       | <i>Blastopirellula marina</i>                              | 0.7% |
|                                       | <i>Methanobrevibacter ruminantium</i>                      | 0.6% |
|                                       | <i>Methanothermus fervidus</i>                             | 0.6% |
|                                       | <i>Methanospirillum hungatei</i>                           | 0.6% |
|                                       | <i>Rhodopirellula baltica</i>                              | 0.6% |
|                                       | <i>Roseiflexus castenholzii</i>                            | 0.6% |
|                                       | <i>Bacillus</i> sp. B14905                                 | 0.6% |
|                                       | <i>Methanosarcina acetivorans</i>                          | 0.6% |
|                                       | <i>Bordetella avium</i>                                    | 0.6% |
|                                       | <i>Methanosarcina barkeri</i>                              | 0.6% |
|                                       | <i>Acinetobacter baumannii</i>                             | 0.6% |
|                                       | <i>Desulfovibrio desulfuricans</i>                         | 0.5% |
|                                       | <i>Desulfitobacterium hafniense</i>                        | 0.5% |
|                                       | <i>Thermotogales bacterium</i> mesG1.Ag.4.2                | 0.5% |
|                                       | <i>Methanosarcina mazei</i>                                | 0.5% |
|                                       | <i>Bordetella bronchiseptica</i>                           | 0.5% |
| <i>Candidatus Solibacter usitatus</i> | 0.5%                                                       |      |
| Strain                                | <i>Methanosaeta thermophila</i> PT                         | 3.0% |
|                                       | <i>Methanothermobacter thermautotrophicus</i> str. Delta H | 2.7% |
|                                       | <i>Methanothermobacter marburgensis</i> str. Marburg       | 1.5% |
|                                       | <i>Syntrophobacter fumaroxidans</i> MPOB                   | 1.0% |
|                                       | <i>Syntrophus aciditrophicus</i> SB                        | 0.9% |
|                                       | <i>Candidatus Methanoregula boonei</i> 6A8                 | 0.9% |
|                                       | <i>Methanoculleus marisnigri</i> JR1                       | 0.9% |
|                                       | <i>Methanobrevibacter smithii</i> ATCC 35061               | 0.8% |
|                                       | <i>Pirellula staleyii</i> DSM 6068                         | 0.7% |

|                                                   |      |
|---------------------------------------------------|------|
| <i>Methanosphaera stadtmanae</i> DSM 3091         | 0.7% |
| <i>Lysinibacillus sphaericus</i> C3-41            | 0.7% |
| <i>Methanosphaerula palustris</i> E1-9c           | 0.7% |
| <i>Roseiflexus</i> sp. RS-1                       | 0.7% |
| <i>Blastopirellula marina</i> DSM 3645            | 0.7% |
| <i>Methanobrevibacter ruminantium</i> M1          | 0.6% |
| <i>Methanothermobacter formicophilus</i> DSM 2088 | 0.6% |
| <i>Methanospirillum hungatei</i> JF-1             | 0.6% |
| <i>Rhodopirellula baltica</i> SH 1                | 0.6% |
| <i>Roseiflexus castenholzii</i> DSM 13941         | 0.6% |
| <i>Bacillus</i> sp. B14905                        | 0.6% |
| <i>Methanosarcina acetivorans</i> C2A             | 0.6% |
| <i>Bordetella avium</i> 197N                      | 0.6% |
| <i>Methanosarcina barkeri</i> str. Fusaro         | 0.6% |
| <i>Thermotoga bacterium</i> mesG1.Ag.4.2          | 0.5% |
| <i>Methanosarcina mazei</i> Go1                   | 0.5% |
| <i>Bordetella bronchiseptica</i> RB50             | 0.5% |
| <i>Candidatus Solibacter usitatus</i> Ellin6076   | 0.5% |
| <i>Achromobacter xylosoxidans</i> A8              | 0.4% |
| <i>Methanocaldococcus jannaschii</i> DSM 2661     | 0.4% |
| uncultured <i>methanogenic archaeon</i> RC-I      | 0.4% |

39 

---

 Note: only top 20 at phylum, class and order level; top 30 at family, genus, species  
40 and strain level are listed.

41 **Table S4. Taxonomic affiliation at different levels based on cDNA sequences**  
 42 **from RefSeq database.**

|        |                                      |       |
|--------|--------------------------------------|-------|
| Domain | Bacteria                             | 96.3% |
|        | Archaea                              | 2.1%  |
|        | Eukaryota                            | 1.1%  |
|        | Viruses                              | 0.4%  |
| Phylum | Firmicutes                           | 43.9% |
|        | Bacteroidetes                        | 17.1% |
|        | Proteobacteria                       | 9.7%  |
|        | Thermotogae                          | 8.0%  |
|        | Spirochaetes                         | 3.5%  |
|        | Synergistetes                        | 2.6%  |
|        | Actinobacteria                       | 2.5%  |
|        | Chloroflexi                          | 2.0%  |
|        | Euryarchaeota                        | 1.8%  |
|        | Fusobacteria                         | 1.1%  |
|        | Cyanobacteria                        | 1.0%  |
|        | Lentisphaerae                        | 0.7%  |
|        | Chlorobi                             | 0.6%  |
|        | Verrucomicrobia                      | 0.5%  |
|        | Planctomycetes                       | 0.5%  |
|        | Deinococcus-Thermus                  | 0.4%  |
|        | unclassified (derived from Viruses)  | 0.4%  |
|        | Acidobacteria                        | 0.4%  |
|        | unclassified (derived from Bacteria) | 0.4%  |
|        | Deferribacteres                      | 0.3%  |
| Class  | Clostridia                           | 34.6% |
|        | Bacteroidia                          | 13.4% |
|        | Thermotogae (class)                  | 8.0%  |
|        | Bacilli                              | 7.9%  |
|        | Spirochaetes (class)                 | 3.5%  |
|        | Gammaproteobacteria                  | 3.2%  |
|        | Deltaproteobacteria                  | 3.0%  |
|        | Synergistia                          | 2.6%  |
|        | Actinobacteria (class)               | 2.5%  |
|        | Alphaproteobacteria                  | 1.8%  |
|        | Flavobacteria                        | 1.6%  |
|        | Betaproteobacteria                   | 1.1%  |
|        | Fusobacteria (class)                 | 1.1%  |
|        | Chloroflexi (class)                  | 1.0%  |

|        |                                                   |       |
|--------|---------------------------------------------------|-------|
|        | Sphingobacteria                                   | 1.0%  |
|        | unclassified (derived from Cyanobacteria)         | 0.9%  |
|        | Negativicutes                                     | 0.9%  |
|        | Cytophagia                                        | 0.9%  |
|        | Dehalococcoidetes                                 | 0.7%  |
|        | unclassified (derived from Lentisphaerae)         | 0.7%  |
|        | <hr/>                                             |       |
|        | Clostridiales                                     | 27.6% |
|        | Bacteroidales                                     | 13.4% |
|        | Thermotogales                                     | 8.0%  |
|        | Bacillales                                        | 6.4%  |
|        | Thermoanaerobacterales                            | 6.0%  |
|        | Spirochaetales                                    | 3.5%  |
|        | Synergistales                                     | 2.6%  |
|        | Actinomycetales                                   | 1.8%  |
|        | Flavobacteriales                                  | 1.6%  |
| Order  | Lactobacillales                                   | 1.5%  |
|        | Fusobacteriales                                   | 1.1%  |
|        | Sphingobacteriales                                | 1.0%  |
|        | Desulfuromonadales                                | 0.9%  |
|        | Chloroflexales                                    | 0.9%  |
|        | Selenomonadales                                   | 0.9%  |
|        | Cytophagales                                      | 0.9%  |
|        | Desulfovibrionales                                | 0.8%  |
|        | Burkholderiales                                   | 0.7%  |
|        | Enterobacteriales                                 | 0.7%  |
|        | Rhizobiales                                       | 0.7%  |
|        | <hr/>                                             |       |
|        | Clostridiaceae                                    | 16.5% |
|        | Thermotogaceae                                    | 7.2%  |
|        | Bacteroidaceae                                    | 7.1%  |
|        | Porphyromonadaceae                                | 4.5%  |
|        | Bacillaceae                                       | 4.4%  |
|        | Thermoanaerobacteraceae                           | 3.7%  |
|        | Spirochaetaceae                                   | 3.1%  |
| Family | Peptococcaceae                                    | 2.7%  |
|        | Synergistaceae                                    | 2.6%  |
|        | Ruminococcaceae                                   | 2.2%  |
|        | Thermoanaerobacterales Family III. Incertae Sedis | 2.2%  |
|        | Flavobacteriaceae                                 | 1.5%  |
|        | Clostridiales Family XI. Incertae Sedis           | 1.4%  |
|        | Prevotellaceae                                    | 1.3%  |
|        | Eubacteriaceae                                    | 1.2%  |
|        | Lachnospiraceae                                   | 1.1%  |

|                                               |       |
|-----------------------------------------------|-------|
| Fusobacteriaceae                              | 1.1%  |
| Paenibacillaceae                              | 1.0%  |
| Syntrophomonadaceae                           | 1.0%  |
| Chloroflexaceae                               | 0.8%  |
| unclassified (derived from Thermotogales)     | 0.7%  |
| Enterobacteriaceae                            | 0.7%  |
| Cytophagaceae                                 | 0.7%  |
| Veillonellaceae                               | 0.7%  |
| unclassified (derived from Dehalococcoidetes) | 0.7%  |
| Desulfovibrionaceae                           | 0.7%  |
| Chlorobiaceae                                 | 0.6%  |
| Victivallaceae                                | 0.6%  |
| Sphingobacteriaceae                           | 0.6%  |
| Halanaerobiaceae                              | 0.5%  |
| <hr/>                                         |       |
| <i>Clostridium</i>                            | 13.2% |
| <i>Bacteroides</i>                            | 7.1%  |
| <i>Alkaliphilus</i>                           | 3.4%  |
| <i>Petrotoga</i>                              | 3.3%  |
| <i>Bacillus</i>                               | 3.0%  |
| <i>Parabacteroides</i>                        | 2.0%  |
| <i>Thermotoga</i>                             | 1.8%  |
| <i>Treponema</i>                              | 1.5%  |
| <i>Caldanaerobacter</i>                       | 1.4%  |
| <i>Spirochaeta</i>                            | 1.4%  |
| <i>Paludibacter</i>                           | 1.3%  |
| <i>Prevotella</i>                             | 1.3%  |
| <i>Porphyromonas</i>                          | 1.2%  |
| <i>Caldicellulosiruptor</i>                   | 1.2%  |
| <i>Thermoanaerobacter</i>                     | 1.1%  |
| <i>Aminobacterium</i>                         | 1.0%  |
| <i>Eubacterium</i>                            | 1.0%  |
| <i>Desulfitobacterium</i>                     | 1.0%  |
| <i>Thermosipho</i>                            | 1.0%  |
| <i>Geobacillus</i>                            | 0.9%  |
| <i>Desulfotomaculum</i>                       | 0.9%  |
| <i>Paenibacillus</i>                          | 0.8%  |
| unclassified (derived from Thermotogales)     | 0.7%  |
| <i>Fervidobacterium</i>                       | 0.7%  |
| <i>Desulfovibrio</i>                          | 0.7%  |
| <i>Ruminococcus</i>                           | 0.6%  |
| <i>Victivallis</i>                            | 0.6%  |
| <i>Dehalococcoides</i>                        | 0.6%  |

Genus

|                                |                                             |      |
|--------------------------------|---------------------------------------------|------|
|                                | <i>Fusobacterium</i>                        | 0.6% |
|                                | <i>Syntrophomonas</i>                       | 0.6% |
| Species                        | <i>Petrotoga mobilis</i>                    | 3.3% |
|                                | <i>Clostridium botulinum</i>                | 2.1% |
|                                | <i>Alkaliphilus metalliredigens</i>         | 1.9% |
|                                | <i>Clostridium thermocellum</i>             | 1.5% |
|                                | <i>Alkaliphilus oremlandii</i>              | 1.5% |
|                                | <i>Caldanaerobacter subterraneus</i>        | 1.4% |
|                                | <i>Paludibacter propionigenes</i>           | 1.3% |
|                                | <i>Spirochaeta smaragdinae</i>              | 1.1% |
|                                | <i>Aminobacterium colombiense</i>           | 1.0% |
|                                | <i>Desulfitobacterium hafniense</i>         | 1.0% |
|                                | <i>Clostridium difficile</i>                | 0.9% |
|                                | <i>Porphyromonas gingivalis</i>             | 0.9% |
|                                | <i>Bacteroides fragilis</i>                 | 0.9% |
|                                | <i>Bacteroides</i> sp. 20_3                 | 0.9% |
|                                | <i>Thermotogales bacterium</i> mesG1.Ag.4.2 | 0.7% |
|                                | <i>Caldicellulosiruptor saccharolyticus</i> | 0.7% |
|                                | <i>Thermosipho melanesiensis</i>            | 0.7% |
|                                | <i>Fervidobacterium nodosum</i>             | 0.7% |
|                                | <i>Clostridium kluyveri</i>                 | 0.7% |
|                                | <i>Treponema denticola</i>                  | 0.7% |
|                                | <i>Clostridium carboxidivorans</i>          | 0.6% |
|                                | <i>Bacteroides</i> sp. 1_1_6                | 0.6% |
|                                | <i>Victivallis vadensis</i>                 | 0.6% |
|                                | <i>Desulfotomaculum reducens</i>            | 0.6% |
|                                | <i>Parabacteroides distasonis</i>           | 0.6% |
|                                | <i>Clostridium phytofermentans</i>          | 0.6% |
|                                | <i>Clostridium cellulolyticum</i>           | 0.6% |
| <i>Thermotoga maritima</i>     | 0.6%                                        |      |
| <i>Clostridium sticklandii</i> | 0.6%                                        |      |
| <i>Clostridium perfringens</i> | 0.6%                                        |      |
| Strain                         | <i>Petrotoga mobilis</i> SJ95               | 3.3% |
|                                | <i>Alkaliphilus metalliredigens</i> QYMF    | 1.9% |
|                                | <i>Alkaliphilus oremlandii</i> OhILAs       | 1.5% |
|                                | <i>Clostridium thermocellum</i> ATCC 27405  | 1.4% |
|                                | <i>Thermoanaerobacter tengcongensis</i> MB4 | 1.3% |
|                                | <i>Paludibacter propionigenes</i> WB4       | 1.3% |
|                                | <i>Spirochaeta smaragdinae</i> DSM 11293    | 1.1% |
|                                | <i>Aminobacterium colombiense</i> DSM 12261 | 1.0% |
|                                | <i>Bacteroides</i> sp. 20_3                 | 0.9% |
|                                | <i>Thermotogales bacterium</i> mesG1.Ag.4.2 | 0.7% |



|                                                                   |      |
|-------------------------------------------------------------------|------|
| <i>Desulfotobacterium hafniense</i> Y51                           | 0.7% |
| <i>Caldicellulosiruptor saccharolyticus</i> DSM 8903              | 0.7% |
| <i>Thermosiphon melanesiensis</i> BI429                           | 0.7% |
| <i>Fervidobacterium nodosum</i> Rt17-B1                           | 0.7% |
| <i>Treponema denticola</i> ATCC 35405                             | 0.7% |
| <i>Clostridium carboxidivorans</i> P7                             | 0.6% |
| <i>Bacteroides</i> sp. 1_1_6                                      | 0.6% |
| <i>Victivallis vadensis</i> ATCC BAA-548                          | 0.6% |
| <i>Desulfotomaculum reducens</i> MI-1                             | 0.6% |
| <i>Parabacteroides distasonis</i> ATCC 8503                       | 0.6% |
| <i>Clostridium phytofermentans</i> ISDg                           | 0.6% |
| <i>Clostridium cellulolyticum</i> H10                             | 0.6% |
| <i>Thermotoga maritima</i> MSB8                                   | 0.6% |
| <i>Clostridium sticklandii</i> DSM 519                            | 0.6% |
| <i>Syntrophomonas wolfei</i> subsp. <i>wolfei</i> str. Goettingen | 0.6% |
| <i>Clostridium botulinum</i> A str. ATCC 3502                     | 0.6% |
| <i>Clostridium kluyveri</i> DSM 555                               | 0.6% |
| <i>Dethiosulfovibrio peptidovorans</i> DSM 11002                  | 0.6% |
| <i>Thermoanaerobacter</i> sp. X513                                | 0.5% |
| <i>Clostridium acetobutylicum</i> ATCC 824                        | 0.5% |

43 

---

 Note: only top 20 at phylum, class and order level; top 30 at family, genus, species  
44 and strain level are listed.

45

46 **Table S5. Categories of functional genes at different levels based on DNA**  
 47 **sequences from Subsystems database (only top 30 at Level 2, top 50 at Level 3**  
 48 **and Function were listed, Level 1 see Figure 5)**

|         |                                                                   |       |
|---------|-------------------------------------------------------------------|-------|
|         | NULL                                                              | 19.8% |
|         | Protein biosynthesis                                              | 7.3%  |
|         | Plant-Prokaryote DOE project                                      | 5.4%  |
|         | Central carbohydrate metabolism                                   | 4.0%  |
|         | RNA processing and modification                                   | 3.4%  |
|         | DNA repair                                                        | 2.8%  |
|         | Lysine, threonine, methionine, and cysteine                       | 2.8%  |
|         | Electron donating reactions                                       | 2.3%  |
|         | One-carbon Metabolism                                             | 2.1%  |
|         | Purines                                                           | 2.0%  |
|         | Folate and pterines                                               | 2.0%  |
|         | Branched-chain amino acids                                        | 1.8%  |
|         | Aromatic amino acids and derivatives                              | 1.8%  |
|         | Resistance to antibiotics and toxic compounds                     | 1.8%  |
|         | DNA replication                                                   | 1.7%  |
| Level 2 | ABC transporters                                                  | 1.6%  |
|         | Tetrapyrroles                                                     | 1.5%  |
|         | Protein degradation                                               | 1.5%  |
|         | Capsular and extracellular polysacchrides                         | 1.5%  |
|         | Transcription                                                     | 1.5%  |
|         | Monosaccharides                                                   | 1.5%  |
|         | Arginine; urea cycle, polyamines                                  | 1.5%  |
|         | Di- and oligosaccharides                                          | 1.0%  |
|         | Pyrimidines                                                       | 1.0%  |
|         | Fermentation                                                      | 0.9%  |
|         | Protein folding                                                   | 0.9%  |
|         | Protein processing and modification                               | 0.9%  |
|         | Oxidative stress                                                  | 0.9%  |
|         | Glutamine, glutamate, aspartate, asparagine; ammonia assimilation | 0.8%  |
|         | Gram-Negative cell wall components                                | 0.8%  |
|         | Methanogenesis                                                    | 1.0%  |
|         | Methionine_Biosynthesis                                           | 0.9%  |
| Level 3 | De_Novo_Purine_Biosynthesis                                       | 0.9%  |
|         | Serine-glyoxylate_cycle                                           | 0.9%  |
|         | DNA_repair,_UvrABC_system                                         | 0.9%  |

|                                                                                                               |      |
|---------------------------------------------------------------------------------------------------------------|------|
| Purine_conversions                                                                                            | 0.9% |
| tRNA_modification_Archaea                                                                                     | 0.9% |
| Coenzyme_B12_biosynthesis                                                                                     | 0.9% |
| Branched-Chain_Amino_Acid_Biosynthesis                                                                        | 0.8% |
| Sugar_utilization_in_Thermotogales                                                                            | 0.8% |
| DNA_repair,_bacterial                                                                                         | 0.7% |
| Arginine_Biosynthesis_extended                                                                                | 0.7% |
| Ribosome_LSU_bacterial                                                                                        | 0.7% |
| DNA-replication                                                                                               | 0.7% |
| Phosphate_metabolism                                                                                          | 0.7% |
| YgfZ                                                                                                          | 0.7% |
| RNA_polymerase_bacterial                                                                                      | 0.7% |
| Hydrogenases                                                                                                  | 0.6% |
| ABC_transporter_oligopeptide_(TC_3.A.1.5.1)                                                                   | 0.6% |
| Glycolysis_and_Gluconeogenesis                                                                                | 0.6% |
| Pyruvate_metabolism_I:_anaplerotic_reactions,_PEP                                                             | 0.6% |
| Proteolysis_in_bacteria,_ATP-dependent                                                                        | 0.6% |
| Glutamine,_Glutamate,_Aspartate_and_Aspargine_Biosynthesis                                                    | 0.6% |
| Universal_GTPases                                                                                             | 0.6% |
| Bacterial_Cell_Division                                                                                       | 0.6% |
| Methanogenesis_strays                                                                                         | 0.6% |
| Peptidoglycan_Biosynthesis                                                                                    | 0.6% |
| Ammonia_assimilation                                                                                          | 0.6% |
| Respiratory_Complex_I                                                                                         | 0.6% |
| Heat_shock_dnaK_gene_cluster_extended                                                                         | 0.5% |
| DNA_replication,_archaeal                                                                                     | 0.5% |
| Histidine_Biosynthesis                                                                                        | 0.5% |
| PROSC                                                                                                         | 0.5% |
| Protein_chaperones                                                                                            | 0.5% |
| De_Novo_Pyrimidine_Synthesis                                                                                  | 0.5% |
| Ribosome_SSU_bacterial                                                                                        | 0.5% |
| Cell_division-ribosomal_stress_proteins_cluster                                                               | 0.5% |
| Restriction-Modification_System                                                                               | 0.5% |
| Chorismate:_Intermediate_for_synthesis_of_Tryptophan,_PABA_antibiotics,_PABA,_3-hydroxyanthranilate_and_more. | 0.5% |
| Glycolysis_and_Gluconeogenesis,_including_Archaeal_enzymes                                                    | 0.5% |
| ABC_transporter_branched-chain_amino_acid_(TC_3.A.1.4.1)                                                      | 0.5% |
| Ribonucleotide_reduction                                                                                      | 0.5% |

|          |                                                                                       |      |
|----------|---------------------------------------------------------------------------------------|------|
|          | pyrimidine_conversions                                                                | 0.5% |
|          | V-Type_ATP_synthase                                                                   | 0.5% |
|          | CBSS-350688.3.peg.1509                                                                | 0.5% |
|          | Pyruvate_metabolism_II:_acetyl-CoA,_acetogenesis_from_pyruvate                        | 0.5% |
|          | Fatty_Acid_Biosynthesis_FASII                                                         | 0.4% |
|          | Calvin-Benson_cycle                                                                   | 0.4% |
|          | HtrA_and_Sec_secretion                                                                | 0.4% |
|          | Potassium_homeostasis                                                                 | 0.4% |
|          | <hr/>                                                                                 |      |
|          | Carbamoyl-phosphate synthase large chain (EC 6.3.5.5)                                 | 0.5% |
|          | Cell division protein FtsH (EC 3.4.24.-)                                              | 0.5% |
|          | Excinuclease ABC subunit A                                                            | 0.5% |
|          | Copper-translocating P-type ATPase (EC 3.6.3.4)                                       | 0.5% |
|          | Chaperone protein DnaK                                                                | 0.4% |
|          | Type I restriction-modification system, restriction subunit R (EC 3.1.21.3)           | 0.4% |
|          | Glycosyltransferase                                                                   | 0.4% |
|          | Acetyl-coenzyme A synthetase (EC 6.2.1.1)                                             | 0.4% |
|          | Isoleucyl-tRNA synthetase (EC 6.1.1.5)                                                | 0.4% |
|          | Aspartate aminotransferase (EC 2.6.1.1)                                               | 0.4% |
|          | Translation elongation factor G                                                       | 0.3% |
|          | Leucyl-tRNA synthetase (EC 6.1.1.4)                                                   | 0.3% |
|          | DNA gyrase subunit A (EC 5.99.1.3)                                                    | 0.3% |
|          | Excinuclease ABC subunit B                                                            | 0.3% |
|          | Valyl-tRNA synthetase (EC 6.1.1.9)                                                    | 0.3% |
| Function | UDP-glucose 4-epimerase (EC 5.1.3.2)                                                  | 0.3% |
|          | DNA polymerase III alpha subunit (EC 2.7.7.7)                                         | 0.3% |
|          | DNA-directed RNA polymerase beta' subunit (EC 2.7.7.6)                                | 0.3% |
|          | Type I restriction-modification system, DNA-methyltransferase subunit M (EC 2.1.1.72) | 0.3% |
|          | decarboxylase                                                                         | 0.3% |
|          | DNA-directed RNA polymerase beta subunit (EC 2.7.7.6)                                 | 0.3% |
|          | Long-chain-fatty-acid--CoA ligase (EC 6.2.1.3)                                        | 0.3% |
|          | ClpB protein                                                                          | 0.3% |
|          | CoB--CoM heterodisulfide reductase subunit A (EC 1.8.98.1)                            | 0.3% |
|          | Heat shock protein 60 family chaperone GroEL                                          | 0.3% |
|          | Cysteine desulfurase (EC 2.8.1.7)                                                     | 0.3% |
|          | GTP-binding protein                                                                   | 0.3% |
|          | Threonyl-tRNA synthetase (EC 6.1.1.3)                                                 | 0.3% |
|          | Pyruvate-flavodoxin oxidoreductase (EC 1.2.7.-)                                       | 0.3% |
|          | Alanyl-tRNA synthetase (EC 6.1.1.7)                                                   | 0.3% |

|                                                                                |      |
|--------------------------------------------------------------------------------|------|
| ATP-dependent protease La (EC 3.4.21.53) Type I                                | 0.3% |
| Glutamate synthase [NADPH] large chain (EC 1.4.1.13)                           | 0.2% |
| Glucosamine--fructose-6-phosphate aminotransferase [isomerizing] (EC 2.6.1.16) | 0.2% |
| Enolase (EC 4.2.1.11)                                                          | 0.2% |
| CTP synthase (EC 6.3.4.2)                                                      | 0.2% |
| Protein export cytoplasm protein SecA ATPase RNA helicase (TC 3.A.5.1.1)       | 0.2% |
| DNA gyrase subunit B (EC 5.99.1.3)                                             | 0.2% |
| Glutamine synthetase type I (EC 6.3.1.2)                                       | 0.2% |
| DNA topoisomerase I (EC 5.99.1.2)                                              | 0.2% |
| Adenosylhomocysteinase (EC 3.3.1.1)                                            | 0.2% |
| DNA polymerase I (EC 2.7.7.7)                                                  | 0.2% |
| Glycogen phosphorylase (EC 2.4.1.1)                                            | 0.2% |
| GMP synthase [glutamine-hydrolyzing] (EC 6.3.5.2)                              | 0.2% |
| Phenylacetate-coenzyme A ligase (EC 6.2.1.30)                                  | 0.2% |
| Cell division protein FtsZ (EC 3.4.24.-)                                       | 0.2% |
| Ribonucleotide reductase of class III (anaerobic), large subunit (EC 1.17.4.2) | 0.2% |
| Methionyl-tRNA synthetase (EC 6.1.1.10)                                        | 0.2% |
| Ferrous iron transport protein B                                               | 0.2% |
| Acetolactate synthase large subunit (EC 2.2.1.6)                               | 0.2% |
| Translation initiation factor 2                                                | 0.2% |

---

50 **Table S6. Categories of functional genes at different levels based on cDNA**  
 51 **sequences from Subsystems database (only top 30 at Level 2, top 50 at Level 3**  
 52 **and Function were listed, Level 1 see Figure 5)**

|         |                                                                   |       |
|---------|-------------------------------------------------------------------|-------|
|         | NULL                                                              | 17.4% |
|         | Protein biosynthesis                                              | 9.3%  |
|         | Central carbohydrate metabolism                                   | 6.4%  |
|         | Plant-Prokaryote DOE project                                      | 4.9%  |
|         | Flagellar motility in Prokaryota                                  | 2.9%  |
|         | ABC transporters                                                  | 2.9%  |
|         | Electron donating reactions                                       | 2.8%  |
|         | Monosaccharides                                                   | 2.7%  |
|         | Alanine, serine, and glycine                                      | 2.4%  |
|         | Purines                                                           | 2.1%  |
|         | Lysine, threonine, methionine, and cysteine                       | 2.1%  |
|         | Selenoproteins                                                    | 2.1%  |
|         | Fermentation                                                      | 2.1%  |
|         | Oxidative stress                                                  | 1.9%  |
| Level 2 | Arginine; urea cycle, polyamines                                  | 1.7%  |
|         | Transcription                                                     | 1.7%  |
|         | RNA processing and modification                                   | 1.7%  |
|         | Protein degradation                                               | 1.5%  |
|         | Pathogenicity islands                                             | 1.5%  |
|         | ATP synthases                                                     | 1.3%  |
|         | Di- and oligosaccharides                                          | 1.3%  |
|         | Glutamine, glutamate, aspartate, asparagine; ammonia assimilation | 1.2%  |
|         | DNA repair                                                        | 1.2%  |
|         | Pyridoxine                                                        | 1.1%  |
|         | One-carbon Metabolism                                             | 1.1%  |
|         | CO <sub>2</sub> fixation                                          | 1.1%  |
|         | Sugar alcohols                                                    | 1.0%  |
|         | Heat shock                                                        | 1.0%  |
|         | Branched-chain amino acids                                        | 0.9%  |
|         | Aromatic amino acids and derivatives                              | 0.9%  |
| Level 3 | Ribosome_LSU_bacterial                                            | 2.5%  |
|         | ABC_transporter_oligopeptide_(TC_3.A.1.5.1)                       | 2.1%  |
|         | Sugar_utilization_in_Thermotogales                                | 2.0%  |
|         | Hydrogenases                                                      | 1.9%  |

|                                                              |      |
|--------------------------------------------------------------|------|
| Glycine_reductase,_sarcosine_reductase_and_betaine_reductase | 1.7% |
| Pyruvate:ferredoxin_oxidoreductase                           | 1.6% |
| Staphylococcal_pathogenicity_islands_SaPI                    | 1.5% |
| Ribosome_SSU_bacterial                                       | 1.4% |
| Flagellum_in_Campylobacter                                   | 1.3% |
| RNA_polymerase_bacterial                                     | 1.3% |
| Glycolysis_and_Gluconeogenesis                               | 1.2% |
| Glycolysis_and_Gluconeogenesis,_including_Archaeal_enzymes   | 1.2% |
| Translation_elongation_factors_bacterial                     | 1.2% |
| Pyridoxin_(Vitamin_B6)_Biosynthesis                          | 1.1% |
| Translation_elongation_factor_G_family                       | 1.1% |
| Flagellum                                                    | 1.1% |
| Purine_conversions                                           | 1.0% |
| Heat_shock_dnaK_gene_cluster_extended                        | 1.0% |
| Calvin-Benson_cycle                                          | 0.9% |
| Glycine_and_Serine_Utilization                               | 0.9% |
| Serine-glyoxylate_cycle                                      | 0.9% |
| Acetone_Butanol_Ethanol_Synthesis                            | 0.9% |
| Pyruvate_metabolism_I:_anaplerotic_reactions,_PEP            | 0.8% |
| PROSC                                                        | 0.8% |
| Rubryerythrin                                                | 0.7% |
| HtrA_and_Sec_secretion                                       | 0.7% |
| Glycine_cleavage_system                                      | 0.7% |
| Glutamine,_Glutamate,_Aspartate_and_Asparagine_Biosynthesis  | 0.7% |
| V-Type_ATP_synthase                                          | 0.7% |
| Proteolysis_in_bacteria,_ATP-dependent                       | 0.6% |
| DNA_structural_proteins,_bacterial                           | 0.6% |
| Polyhydroxybutyrate_metabolism                               | 0.6% |
| De_Novo_Purine_Biosynthesis                                  | 0.6% |
| F0F1-type_ATP_synthase                                       | 0.6% |
| Glycine_Biosynthesis                                         | 0.6% |
| Bacterial_Cell_Division                                      | 0.6% |
| Anaerobic_Oxidative_Degradation_of_L-Ornithine               | 0.6% |
| Flagellar_motility                                           | 0.6% |
| CBSS-312309.3.peg.1965                                       | 0.6% |
| Maltose_and_Maltodextrin_Utilization                         | 0.5% |
| DNA-replication                                              | 0.5% |
| Oxidative_stress                                             | 0.5% |
| Phosphate_metabolism                                         | 0.5% |

|          |                                                                                            |      |
|----------|--------------------------------------------------------------------------------------------|------|
|          | Acetyl-CoA_fermentation_to_Butyrate                                                        | 0.5% |
|          | Purine_Utilization                                                                         | 0.5% |
|          | Cell_division-ribosomal_stress_proteins_cluster                                            | 0.5% |
|          | COG1399                                                                                    | 0.5% |
|          | Arginine_and_Ornithine_Degradation                                                         | 0.5% |
|          | Fatty_Acid_Biosynthesis_FASII                                                              | 0.5% |
|          | Arginine_Biosynthesis_extended                                                             | 0.4% |
|          | <hr/>                                                                                      |      |
|          | Heat shock protein 60 family chaperone GroEL                                               | 1.4% |
|          | Pyruvate-flavodoxin oxidoreductase (EC 1.2.7.-)                                            | 1.3% |
|          | Flagellin protein FlaA                                                                     | 1.3% |
|          | Oligopeptide ABC transporter, periplasmic oligopeptide-binding protein OppA (TC 3.A.1.5.1) | 1.2% |
|          | Translation elongation factor Tu                                                           | 1.2% |
|          | NAD-dependent glyceraldehyde-3-phosphate dehydrogenase (EC 1.2.1.12)                       | 0.9% |
|          | Translation elongation factor G                                                            | 0.8% |
|          | Glycerol kinase (EC 2.7.1.30)                                                              | 0.7% |
|          | DNA-directed RNA polymerase beta' subunit (EC 2.7.7.6)                                     | 0.7% |
|          | Chaperone protein DnaK                                                                     | 0.7% |
|          | Pyruvate,phosphate dikinase (EC 2.7.9.1)                                                   | 0.6% |
|          | NAD-reducing hydrogenase subunit HoxF (EC 1.12.1.2)                                        | 0.6% |
|          | Periplasmic [Fe] hydrogenase large subunit (EC 1.12.7.2)                                   | 0.6% |
|          | Phosphoglycerate kinase (EC 2.7.2.3)                                                       | 0.6% |
|          | DNA-directed RNA polymerase beta subunit (EC 2.7.7.6)                                      | 0.6% |
| Function | NAD-specific glutamate dehydrogenase (EC 1.4.1.2)                                          | 0.5% |
|          | Enolase (EC 4.2.1.11)                                                                      | 0.5% |
|          | Acetyl-CoA acetyltransferase (EC 2.3.1.9)                                                  | 0.5% |
|          | Flagellin                                                                                  | 0.4% |
|          | NADP-specific glutamate dehydrogenase (EC 1.4.1.4)                                         | 0.4% |
|          | Rubryerythrin                                                                              | 0.4% |
|          | Fructose-bisphosphate aldolase class II (EC 4.1.2.13)                                      | 0.4% |
|          | Ribose ABC transport system, periplasmic ribose-binding protein RbsB (TC 3.A.1.2.1)        | 0.4% |
|          | Cell division protein FtsH (EC 3.4.24.-)                                                   | 0.4% |
|          | 2-amino-3-ketobutyrate coenzyme A ligase (EC 2.3.1.29)                                     | 0.4% |
|          | Aspartate aminotransferase (EC 2.6.1.1)                                                    | 0.4% |
|          | Glycine reductase component B gamma subunit (EC 1.2.1.4.2)                                 | 0.4% |
|          | DNA-binding protein HBsu                                                                   | 0.4% |
|          | Hydroxylamine reductase (EC 1.7.-.-)                                                       | 0.4% |
|          | Glycine dehydrogenase [decarboxylating] (glycine cleavage system P2 protein) (EC 1.4.4.2)  | 0.4% |



|                                                                                                          |      |
|----------------------------------------------------------------------------------------------------------|------|
| Glycine reductase component B alpha subunit (EC 1.21.4.2)                                                | 0.4% |
| ClpB protein                                                                                             | 0.4% |
| Glycerol-3-phosphate ABC transporter, periplasmic<br>glycerol-3-phosphate-binding protein (TC 3.A.1.1.3) | 0.3% |
| Glycine reductase component B beta subunit (EC 1.21.4.2)                                                 | 0.3% |
| TonB-dependent receptor                                                                                  | 0.3% |
| Oligopeptide transport ATP-binding protein OppD (TC<br>3.A.1.5.1)                                        | 0.3% |
| Thioredoxin                                                                                              | 0.3% |
| selenocysteine-containing                                                                                | 0.3% |
| Polyribonucleotide nucleotidyltransferase (EC 2.7.7.8)                                                   | 0.3% |
| Phosphoenolpyruvate carboxykinase [GTP] (EC 4.1.1.32)                                                    | 0.3% |
| FIG002344: Hydrolase (HAD superfamily)                                                                   | 0.3% |
| Heat shock protein 60 family co-chaperone GroES                                                          | 0.3% |
| V-type ATP synthase subunit B (EC 3.6.3.14)                                                              | 0.3% |
| Serine hydroxymethyltransferase (EC 2.1.2.1)                                                             | 0.3% |
| Butyryl-CoA dehydrogenase (EC 1.3.99.2)                                                                  | 0.3% |
| Xanthine/uracil/thiamine/ascorbate permease family protein                                               | 0.3% |
| LSU ribosomal protein L1p (L10Ae)                                                                        | 0.3% |
| Short chain fatty acids transporter                                                                      | 0.3% |
| RecA protein                                                                                             | 0.3% |
| Translation elongation factor G-related protein                                                          | 0.3% |

---

54 **Table S7. Gene functions annotated by COG based on DNA sequences (only top**  
 55 **50 are listed).**

| Function                                                                                           | Percent |
|----------------------------------------------------------------------------------------------------|---------|
| Permeases of the major facilitator superfamily                                                     | 0.5%    |
| ABC-type multidrug transport system, ATPase component                                              | 0.5%    |
| ABC-type multidrug transport system, ATPase and permease components                                | 0.5%    |
| Glycosyltransferases involved in cell wall biogenesis                                              | 0.5%    |
| Acyl-coenzyme A synthetases/AMP-(fatty) acid ligases                                               | 0.5%    |
| Aspartate/tyrosine/aromatic aminotransferase                                                       | 0.5%    |
| Isopropylmalate/homocitrate/citramalate synthases                                                  | 0.5%    |
| ATPases with chaperone activity, ATP-binding subunit                                               | 0.4%    |
| Carbamoylphosphate synthase large subunit (split gene in MJ)                                       | 0.4%    |
| DNA-directed RNA polymerase, beta' subunit/160 kD subunit                                          | 0.4%    |
| Nucleoside-diphosphate-sugar epimerases                                                            | 0.4%    |
| Translation elongation factors (GTPases)                                                           | 0.4%    |
| Excinuclease ATPase subunit                                                                        | 0.4%    |
| Phosphoenolpyruvate synthase/pyruvate phosphate dikinase                                           | 0.4%    |
| Pyruvate:ferredoxin oxidoreductase and related 2-oxoacid:ferredoxin oxidoreductases, alpha subunit | 0.4%    |
| Cation transport ATPase                                                                            | 0.4%    |
| DNA-directed RNA polymerase, beta subunit/140 kD subunit                                           | 0.4%    |
| Chaperonin GroEL (HSP60 family)                                                                    | 0.4%    |
| Predicted dehydrogenases and related proteins                                                      | 0.4%    |
| Glycosyltransferase                                                                                | 0.4%    |
| Dehydrogenases with different specificities (related to short-chain alcohol dehydrogenases)        | 0.4%    |
| Molecular chaperone                                                                                | 0.4%    |
| SAM-dependent methyltransferases                                                                   | 0.4%    |
| Fe-S oxidoreductase                                                                                | 0.4%    |
| ATPases of the AAA+ class                                                                          | 0.3%    |
| FOG: CBS domain                                                                                    | 0.3%    |
| Pyruvate:ferredoxin oxidoreductase and related 2-oxoacid:ferredoxin oxidoreductases, gamma subunit | 0.3%    |
| Heterodisulfide reductase, subunit A and related polyferredoxins                                   | 0.3%    |
| NAD-dependent aldehyde dehydrogenases                                                              | 0.3%    |
| Isoleucyl-tRNA synthetase                                                                          | 0.3%    |
| FOG: CheY-like receiver                                                                            | 0.3%    |
| Type IIA topoisomerase (DNA gyrase/topo II, topoisomerase IV), A                                   | 0.3%    |

---

|                                                                                                                                                                |      |
|----------------------------------------------------------------------------------------------------------------------------------------------------------------|------|
| subunit                                                                                                                                                        |      |
| Cation/multidrug efflux pump                                                                                                                                   | 0.3% |
| Leucyl-tRNA synthetase                                                                                                                                         | 0.3% |
| Predicted pyridoxal phosphate-dependent enzyme apparently involved in regulation of cell wall biogenesis                                                       | 0.3% |
| Response regulators consisting of a CheY-like receiver domain and a winged-helix DNA-binding domain                                                            | 0.3% |
| Response regulator containing CheY-like receiver, AAA-type ATPase, and DNA-binding domains                                                                     | 0.3% |
| Acetyl-CoA acetyltransferase                                                                                                                                   | 0.3% |
| Type I restriction-modification system methyltransferase subunit                                                                                               | 0.3% |
| Valyl-tRNA synthetase                                                                                                                                          | 0.3% |
| Helicase subunit of the DNA excision repair complex                                                                                                            | 0.3% |
| Acyl-CoA synthetases (AMP-forming)/AMP-acid ligases II                                                                                                         | 0.3% |
| Superfamily II DNA/RNA helicases, SNF2 family                                                                                                                  | 0.3% |
| Anaerobic dehydrogenases, typically selenocysteine-containing                                                                                                  | 0.3% |
| Cobalamin biosynthesis protein CobN and related Mg-chelatases                                                                                                  | 0.3% |
| Thiamine pyrophosphate-requiring enzymes [acetolactate synthase, pyruvate dehydrogenase (cytochrome), glyoxylate carboligase, phosphonopyruvate decarboxylase] | 0.3% |
| Glutamyl- and glutaminyl-tRNA synthetases                                                                                                                      | 0.2% |
| ATP-dependent Lon protease, bacterial type                                                                                                                     | 0.2% |
| Pyruvate:ferredoxin oxidoreductase and related 2-oxoacid:ferredoxin oxidoreductases, beta subunit                                                              | 0.2% |
| Threonyl-tRNA synthetase                                                                                                                                       | 0.2% |

---

57 **Table S8. Gene functions annotated by COG based on cDNA sequences (only**  
 58 **top 50 are listed).**

| Function                                                                                            | Percent |
|-----------------------------------------------------------------------------------------------------|---------|
| Flagellin and related hook-associated proteins                                                      | 1.8%    |
| Chaperonin GroEL (HSP60 family)                                                                     | 1.3%    |
| Pyruvate:ferredoxin oxidoreductase and related 2-oxoacid:ferredoxin oxidoreductases, alpha subunit  | 1.3%    |
| ABC-type sugar transport system, periplasmic component                                              | 1.1%    |
| GTPases - translation elongation factors                                                            | 1.1%    |
| Glutamate dehydrogenase/leucine dehydrogenase                                                       | 1.0%    |
| Translation elongation factors (GTPases)                                                            | 1.0%    |
| Glyceraldehyde-3-phosphate dehydrogenase/erythrose-4-phosphate dehydrogenase                        | 0.9%    |
| ATPases with chaperone activity, ATP-binding subunit                                                | 0.8%    |
| Phosphoenolpyruvate synthase/pyruvate phosphate dikinase                                            | 0.8%    |
| Pyruvate:ferredoxin oxidoreductase and related 2-oxoacid:ferredoxin oxidoreductases, gamma subunit  | 0.8%    |
| ABC-type oligopeptide transport system, periplasmic component                                       | 0.7%    |
| Uncharacterized ABC-type transport system, periplasmic component/surface lipoprotein                | 0.7%    |
| DNA-directed RNA polymerase, beta' subunit/160 kD subunit                                           | 0.7%    |
| Acetyl-CoA acetyltransferase                                                                        | 0.7%    |
| Molecular chaperone                                                                                 | 0.7%    |
| Glycerol kinase                                                                                     | 0.7%    |
| Bacterial nucleoid DNA-binding protein                                                              | 0.7%    |
| Predicted dehydrogenases and related proteins                                                       | 0.6%    |
| NADH:ubiquinone oxidoreductase, NADH-binding (51 kD) subunit                                        | 0.6%    |
| 3-phosphoglycerate kinase                                                                           | 0.5%    |
| Enolase                                                                                             | 0.5%    |
| DNA-directed RNA polymerase, beta subunit/140 kD subunit                                            | 0.5%    |
| Response regulators consisting of a CheY-like receiver domain and a winged-helix DNA-binding domain | 0.5%    |
| ABC-type dipeptide transport system, periplasmic component                                          | 0.5%    |
| ABC-type sugar transport systems, ATPase components                                                 | 0.5%    |
| NAD-dependent aldehyde dehydrogenases                                                               | 0.5%    |
| Predicted HD superfamily hydrolase                                                                  | 0.4%    |
| Pyruvate:ferredoxin oxidoreductase and related 2-oxoacid:ferredoxin oxidoreductases, beta subunit   | 0.4%    |
| Aspartate/tyrosine/aromatic aminotransferase                                                        | 0.4%    |

---

|                                                                                                          |      |
|----------------------------------------------------------------------------------------------------------|------|
| Acyl-CoA dehydrogenases                                                                                  | 0.4% |
| Fructose/tagatose bisphosphate aldolase                                                                  | 0.4% |
| Rubrerythrin                                                                                             | 0.4% |
| 7-keto-8-aminopelargonate synthetase and related enzymes                                                 | 0.4% |
| NADH dehydrogenase/NADH:ubiquinone oxidoreductase 75 kD subunit (chain G)                                | 0.4% |
| Molecular chaperone (small heat shock protein)                                                           | 0.4% |
| Outer membrane protein and related peptidoglycan-associated (lipo)proteins                               | 0.4% |
| ATP-dependent Zn proteases                                                                               | 0.4% |
| Dehydrogenases with different specificities (related to short-chain alcohol dehydrogenases)              | 0.4% |
| Predicted cobalamin binding protein                                                                      | 0.3% |
| Superoxide dismutase                                                                                     | 0.3% |
| Glycine cleavage system protein P (pyridoxal-binding), C-terminal domain                                 | 0.3% |
| DNA-directed RNA polymerase, sigma subunit (sigma70/sigma32)                                             | 0.3% |
| ABC-type oligopeptide transport system, ATPase component                                                 | 0.3% |
| Predicted pyridoxal phosphate-dependent enzyme apparently involved in regulation of cell wall biogenesis | 0.3% |
| 6Fe-6S prismane cluster-containing protein                                                               | 0.3% |
| Phosphoenolpyruvate carboxykinase (GTP)                                                                  | 0.3% |
| Acyl CoA:acetate/3-ketoacid CoA transferase, alpha subunit                                               | 0.3% |
| Predicted Fe-S oxidoreductases                                                                           | 0.3% |
| Polyribonucleotide nucleotidyltransferase (polynucleotide phosphorylase)                                 | 0.3% |

---

**Table S9. COG categories of functional genes of DNA, cDNA datasets and selected microbes.**

| Microbiomes                                   | A   | B   | C    | D   | E    | F   | G    | H   | I   | J    | K   | L   | M    | N   | O   | P   | Q   | R    | S    | T   | U   | V   | W   | X   | Y   | Z   |
|-----------------------------------------------|-----|-----|------|-----|------|-----|------|-----|-----|------|-----|-----|------|-----|-----|-----|-----|------|------|-----|-----|-----|-----|-----|-----|-----|
| Metagenome                                    | 0.0 | 0.1 | 11.0 | 1.0 | 10.4 | 4.3 | 7.2  | 5.8 | 3.0 | 10.1 | 3.2 | 7.7 | 5.1  | 0.2 | 5.2 | 5.3 | 1.3 | 12.2 | 0.5  | 2.4 | 1.7 | 2.4 | 0.0 | 0.0 | 0.0 | 0.0 |
| Metatranscriptome                             | 0.0 | 0.0 | 14.0 | 0.8 | 11.3 | 3.3 | 12.0 | 2.6 | 3.9 | 12.6 | 4.1 | 4.8 | 3.9  | 2.2 | 6.7 | 2.5 | 0.9 | 9.7  | 0.4  | 1.8 | 1.6 | 1.0 | 0.0 | 0.0 | 0.0 | 0.0 |
| <i>Clostridium kluyveri</i>                   | 0.0 | 0.0 | 5.8  | 2.1 | 9.9  | 2.7 | 4.0  | 4.8 | 3.3 | 8.2  | 7.7 | 5.0 | 5.8  | 2.9 | 4.3 | 6.4 | 2.2 | 6.9  | 5.6  | 5.5 | 0.9 | 3.7 | 0.0 | 2.4 | 0.0 | 0.0 |
| <i>Ruminococcaceae bacterium</i>              | 0.0 | 0.0 | 6.8  | 1.7 | 9.5  | 3.2 | 7.0  | 4.5 | 2.8 | 10.6 | 8.1 | 7.0 | 5.4  | 0.3 | 3.2 | 4.9 | 0.8 | 7.1  | 4.7  | 5.5 | 1.7 | 3.6 | 0.0 | 1.4 | 0.0 | 0.0 |
| <i>Petrotoga mobilis</i>                      | 0.0 | 0.0 | 6.5  | 1.3 | 12.9 | 4.6 | 10.0 | 4.0 | 3.2 | 13.7 | 5.1 | 5.3 | 6.2  | 3.3 | 4.8 | 5.0 | 0.7 | 7.6  | 3.5  | 2.4 | 0.7 | 4.5 | 0.0 | 1.0 | 0.0 | 0.0 |
| <i>Clostridium botulinum</i>                  | 0.0 | 0.0 | 6.0  | 2.2 | 8.6  | 4.1 | 6.7  | 5.0 | 3.4 | 10.3 | 7.1 | 5.5 | 5.8  | 3.8 | 4.3 | 5.1 | 0.9 | 6.8  | 5.2  | 4.3 | 0.7 | 2.7 | 0.0 | 1.5 | 0.0 | 0.0 |
| <i>Clostridium thermocellum</i>               | 0.0 | 0.0 | 5.7  | 2.6 | 8.1  | 3.1 | 7.4  | 4.6 | 2.2 | 10.2 | 5.4 | 5.4 | 7.1  | 4.3 | 4.8 | 4.1 | 0.9 | 7.2  | 4.9  | 5.1 | 0.8 | 2.9 | 0.0 | 3.2 | 0.0 | 0.1 |
| <i>Clostridium difficile</i>                  | 0.0 | 0.0 | 6.6  | 1.4 | 9.4  | 3.5 | 9.7  | 4.1 | 2.6 | 8.8  | 9.5 | 5.3 | 5.9  | 2.0 | 3.6 | 4.7 | 1.2 | 5.9  | 5.6  | 5.1 | 0.8 | 3.1 | 0.0 | 1.0 | 0.0 | 0.1 |
| <i>Clostridium carboxidivorans</i>            | 0.0 | 0.0 | 8.0  | 1.6 | 10.5 | 2.6 | 5.8  | 4.4 | 2.9 | 7.3  | 9.4 | 3.9 | 5.7  | 3.4 | 3.9 | 4.7 | 1.9 | 7.0  | 5.9  | 6.5 | 0.4 | 3.7 | 0.0 | 0.5 | 0.0 | 0.0 |
| <i>Clostridium cellulolyticum</i>             | 0.0 | 0.0 | 5.1  | 2.4 | 8.1  | 3.0 | 9.1  | 5.2 | 3.8 | 9.5  | 6.0 | 6.2 | 5.5  | 3.2 | 4.0 | 3.8 | 2.0 | 7.1  | 5.0  | 5.1 | 1.0 | 2.9 | 0.0 | 2.1 | 0.0 | 0.0 |
| <i>Clostridium acetobutylicum</i>             | 0.0 | 0.0 | 5.6  | 1.7 | 8.2  | 2.9 | 11.4 | 4.9 | 3.2 | 7.2  | 9.4 | 4.1 | 6.2  | 3.1 | 3.9 | 4.5 | 1.1 | 7.0  | 5.9  | 5.4 | 0.5 | 2.9 | 0.0 | 0.8 | 0.0 | 0.0 |
| <i>Alkaliphilus metalliredigens</i>           | 0.0 | 0.0 | 8.1  | 1.6 | 12.0 | 3.0 | 5.9  | 4.2 | 2.3 | 7.7  | 6.7 | 4.5 | 5.2  | 2.7 | 3.8 | 5.3 | 1.6 | 6.7  | 6.2  | 5.6 | 0.7 | 4.0 | 0.0 | 2.0 | 0.0 | 0.0 |
| <i>Alkaliphilus oremlandii</i>                | 0.0 | 0.0 | 7.6  | 2.2 | 8.9  | 3.6 | 2.9  | 5.2 | 3.3 | 10.5 | 7.4 | 5.2 | 5.1  | 3.0 | 4.1 | 6.6 | 1.7 | 7.1  | 6.1  | 5.1 | 0.8 | 3.1 | 0.0 | 0.5 | 0.0 | 0.1 |
| <i>Bacteroides</i> sp                         | 0.0 | 0.0 | 5.4  | 1.0 | 9.4  | 6.5 | 12.4 | 5.0 | 3.5 | 8.8  | 4.2 | 5.2 | 10.2 | 0.3 | 4.2 | 4.2 | 0.6 | 6.4  | 4.0  | 4.0 | 0.9 | 2.9 | 0.0 | 0.9 | 0.0 | 0.0 |
| <i>Bacteroides fragilis</i>                   | 0.0 | 0.0 | 6.5  | 1.2 | 8.0  | 3.5 | 9.5  | 5.3 | 2.9 | 9.2  | 4.0 | 5.8 | 12.0 | 0.3 | 4.4 | 6.0 | 0.8 | 6.9  | 3.9  | 4.2 | 1.1 | 3.9 | 0.0 | 0.5 | 0.0 | 0.0 |
| <i>Methanosaeta thermophi</i>                 | 0.2 | 0.5 | 8.3  | 0.8 | 7.7  | 4.5 | 3.4  | 8.9 | 1.8 | 14.1 | 4.7 | 4.8 | 4.1  | 0.1 | 4.7 | 6.5 | 0.7 | 10.4 | 7.9  | 2.6 | 0.8 | 2.3 | 0.5 | 0.5 | 0.0 | 0.0 |
| <i>Methanobrevibacter smithii</i>             | 0.1 | 0.2 | 9.6  | 0.6 | 7.7  | 4.3 | 2.8  | 9.7 | 2.5 | 13.7 | 4.9 | 5.4 | 4.6  | 0.3 | 4.5 | 4.3 | 0.7 | 9.9  | 9.0  | 0.9 | 0.9 | 2.6 | 0.1 | 0.7 | 0.0 | 0.0 |
| <i>Methanoculleus marisnigri</i>              | 0.1 | 0.2 | 8.8  | 0.7 | 6.9  | 3.6 | 3.8  | 8.1 | 1.9 | 10.6 | 5.2 | 4.9 | 4.6  | 1.3 | 5.7 | 5.7 | 0.8 | 11.0 | 8.4  | 4.0 | 0.7 | 2.6 | 0.1 | 0.2 | 0.0 | 0.0 |
| <i>Methanoregula boonei</i>                   | 0.0 | 0.1 | 9.6  | 0.8 | 7.0  | 3.3 | 2.9  | 7.5 | 1.9 | 10.5 | 5.5 | 4.7 | 2.6  | 1.1 | 4.7 | 6.3 | 0.9 | 9.5  | 8.7  | 8.2 | 0.9 | 2.5 | 0.4 | 0.2 | 0.0 | 0.0 |
| <i>Methanospaera stadmanae</i>                | 0.0 | 0.5 | 9.2  | 0.7 | 8.3  | 4.3 | 3.3  | 9.8 | 2.2 | 14.9 | 4.5 | 5.4 | 5.6  | 0.3 | 4.3 | 4.4 | 0.3 | 8.8  | 8.0  | 1.3 | 1.0 | 2.8 | 0.2 | 0.1 | 0.0 | 0.0 |
| <i>Methanothermobacter marburgensis</i>       | 0.1 | 0.3 | 10.5 | 0.4 | 6.3  | 4.5 | 3.1  | 9.3 | 1.9 | 12.7 | 4.5 | 4.5 | 2.9  | 0.3 | 5.0 | 5.5 | 0.9 | 11.1 | 10.0 | 3.5 | 1.0 | 1.3 | 0.1 | 0.1 | 0.0 | 0.0 |
| <i>Methanothermobacter thermautotrophicus</i> | 0.1 | 0.3 | 10.7 | 0.4 | 5.7  | 4.2 | 3.0  | 9.0 | 2.4 | 11.8 | 4.3 | 4.3 | 3.6  | 0.3 | 5.5 | 5.7 | 0.6 | 11.5 | 10.1 | 3.5 | 0.9 | 2.1 | 0.1 | 0.0 | 0.0 | 0.0 |

61 Note: A: RNA processing and modification; B: Chromatin structure and dynamics; C: Energy production and conversion; D: Cell cycle control, cell  
62 division, chromosome partitioning; E: Amino acid transport and metabolism; F: Nucleotide transport and metabolism; G: Carbohydrate transport and  
63 metabolism; H: Coenzyme transport and metabolism; I: Lipid transport and metabolism; J: Lipid transport and metabolism; K: Transcription; L:  
64 Replication, recombination and repair; M: Cell wall/membrane/envelope biogenesis; N: Cell motility; O: Posttranslational modification, protein  
65 turnover, chaperones; P: Inorganic ion transport and metabolism; Q: Secondary metabolites biosynthesis, transport and catabolism; R: General function  
66 prediction only; S: Function unknown; T: Signal transduction mechanisms; U: Intracellular trafficking, secretion, and vesicular transport; V: Defense  
67 mechanisms; W: Extracellular structures; X: Mobilome: prophages, transposons; Y: Nuclear structure; Z: Cytoskeleton
